# Supplementary material
Source: PubMed Central journal article supplement (PMC5024692)
Supplement: supp_fj.201600259RR_Supplemental_Figure1.pdf [file supp_fj.201600259RR_Supplemental_Figure1.pdf]

# Suppl. Fig.1. Cell type- specific CpG sites

A) The average methylation level across the B cell, natural killer (NK), T cell, neutrophil (Neuro), and CD14+ (CD14) monocyte cell types. Red indicates high level of methylation at a cell type and blue indicates low levels of methylation. The 1739 CpG sites are clustered by their similarity using a Pearson's correlation coefficient into 5 groups indicated by the color: a) The light blue cluster contains 217 CpG sites uniquely low to T cells; b) the green cluster contains 463 CpG sites uniquely low to natural killer cells; c) the pink cluster contains 184 CpG sites uniquely low to CD14- positive cells; d) the purple cluster contains 324 CpG sites uniquely low to neutrophils; e) the orange cluster contains 551 CpG sites uniquely low to B cells. B) GREAT annotation of CD14+ CpG sites. The 184 CD14+ cell type- specific CpG sites were submitted to GREAT for enrichment of ontology terms available for the hg19 reference genome. C) GREAT annotation of T cell CpG sites. The 217 T cell type- specific CpG sites were submitted to GREAT for enrichment of ontology terms available for the hg19 reference genome. CpG sites were associated to a single proximal gene transcription start site within 100 kb.

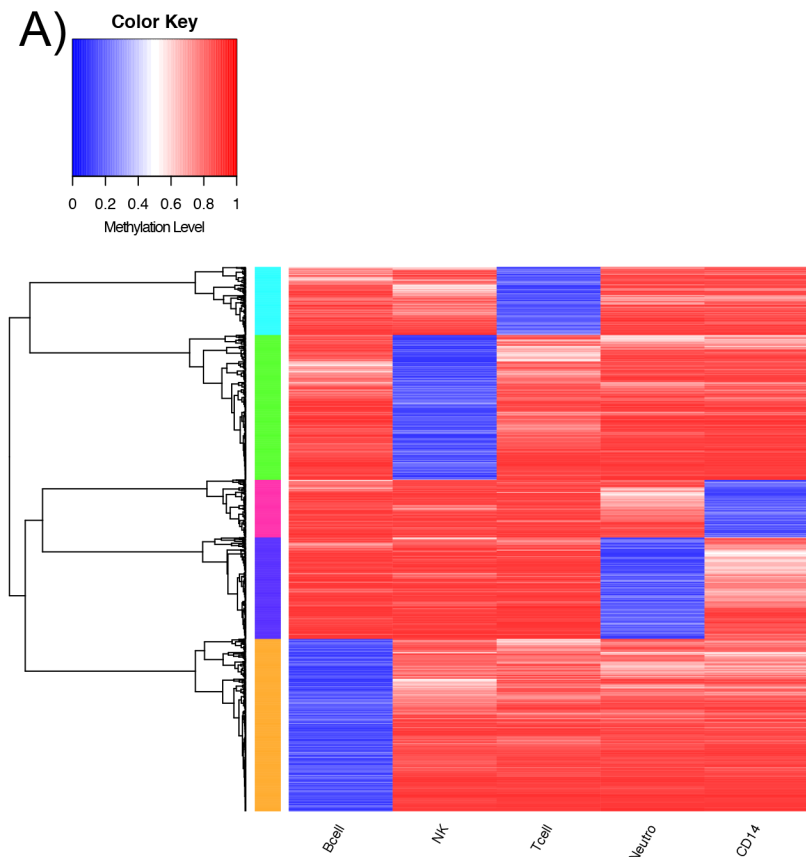

**B)**

| Ontology                      | CD14+ Signature Term Names                                                                                                                                                     | Hyper FDR Q-Val | Hyper Observed Gene Hits | Hyper Total Genes |
|-------------------------------|--------------------------------------------------------------------------------------------------------------------------------------------------------------------------------|-----------------|--------------------------|-------------------|
| MSigDB Perturbation           | Genes with promoters occupied by PML-RARA fusion [GeneID=5371,5914] protein in acute promyelocytic leukemia(APL) cells NB4 and two APL primary blasts, based on Chip-seq data. | 0.001           | 17                       | 423               |
| MSigDB Perturbation           | Genes down-regulated in the urogenital sinus (UGS) of day E16 females exposed to the androgen dihydrotestosterone [PubChem=10635] for 6 h.                                     | 0.039           | 16                       | 516               |
| MSigDB Immunologic Signatures | Genes up-regulated in comparison of control conventional dendritic cells (cDC) at 0 h versus cDCs infected with Newcastle disease virus (NDV) at 18 h.                         | 0.055           | 9                        | 196               |
| MSigDB Immunologic Signatures | Genes down-regulated in comparison of systemic lupus erythematosus B cells versus systemic lupus erythromatosus myeloid cells.                                                 | 0.029           | 10                       | 198               |
| MSigDB Immunologic Signatures | Genes down-regulated in comparison of healthy B cells versus healthy myeloid cells.                                                                                            | 0.035           | 9                        | 198               |
| MSigDB Immunologic Signatures | Genes down-regulated in comparison of naive T cells versus peripheral blood mononuclear cells (PBMC).                                                                          | 0.073           | 9                        | 193               |
| MSigDB Immunologic Signatures | Genes down-regulated in comparison of healthy CD4 [GeneID=920] T cells versus healthy myeloid cells.                                                                           | 0.043           | 9                        | 197               |

**C)**

| Ontology              | Tcell Signature Term Name                             | Hyper FDR Q-Val | Hyper Observed Gene Hits | Hyper Total Genes |
|-----------------------|-------------------------------------------------------|-----------------|--------------------------|-------------------|
| GO Biological Process | positive T cell selection                             | 0.000           | 5                        | 17                |
| GO Biological Process | T cell activation                                     | 0.000           | 14                       | 181               |
| GO Biological Process | cell activation                                       | 0.000           | 21                       | 566               |
| GO Biological Process | lymphocyte activation                                 | 0.000           | 16                       | 288               |
| GO Biological Process | T cell selection                                      | 0.002           | 5                        | 31                |
| Disease Ontology      | leukemia                                              | 0.042           | 19                       | 1046              |
| Disease Ontology      | disease of anatomical entity                          | 0.048           | 63                       | 5897              |
| Disease Ontology      | immune system disease                                 | 0.065           | 42                       | 3423              |
| Disease Ontology      | lymphoblastic leukemia                                | 0.046           | 11                       | 391               |
| Disease Ontology      | neutropenia                                           | 0.056           | 4                        | 33                |
| MSigDB Pathway        | IL 17 Signaling Pathway                               | 0.011           | 3                        | 15                |
| MSigDB Pathway        | NO2-dependent IL 12 Pathway in NK cells               | 0.013           | 3                        | 17                |
| MSigDB Pathway        | Dendritic cells in regulating TH1 and TH2 Development | 0.002           | 4                        | 22                |
| MSigDB Pathway        | Hematopoietic cell lineage                            | 0.017           | 5                        | 86                |
