# Supplementary material
Source: PubMed Central journal article supplement (PMC5024692)

# Suppl. Fig.4. Differentially methylated fragment venn diagram

A) The top 50 differentially methylated fragments between the 2013 samples (blue) and the top 50 differentially methylated fragments between the 2014 samples (red) have 6 common fragments that are proximal to the genes GNG13, VPS53, EMC10, PAX8, TRPC3, and EGFR. B) The bottom 50 differentially methylated fragments between the 2013 samples (green) and the bottom 50 differentially methylated fragments between the 2014 samples (gold) have 5 common fragments that are proximal to the genes CCKBR, TNFRSF11A, TGFB1, POFUT1, and GMEB2.

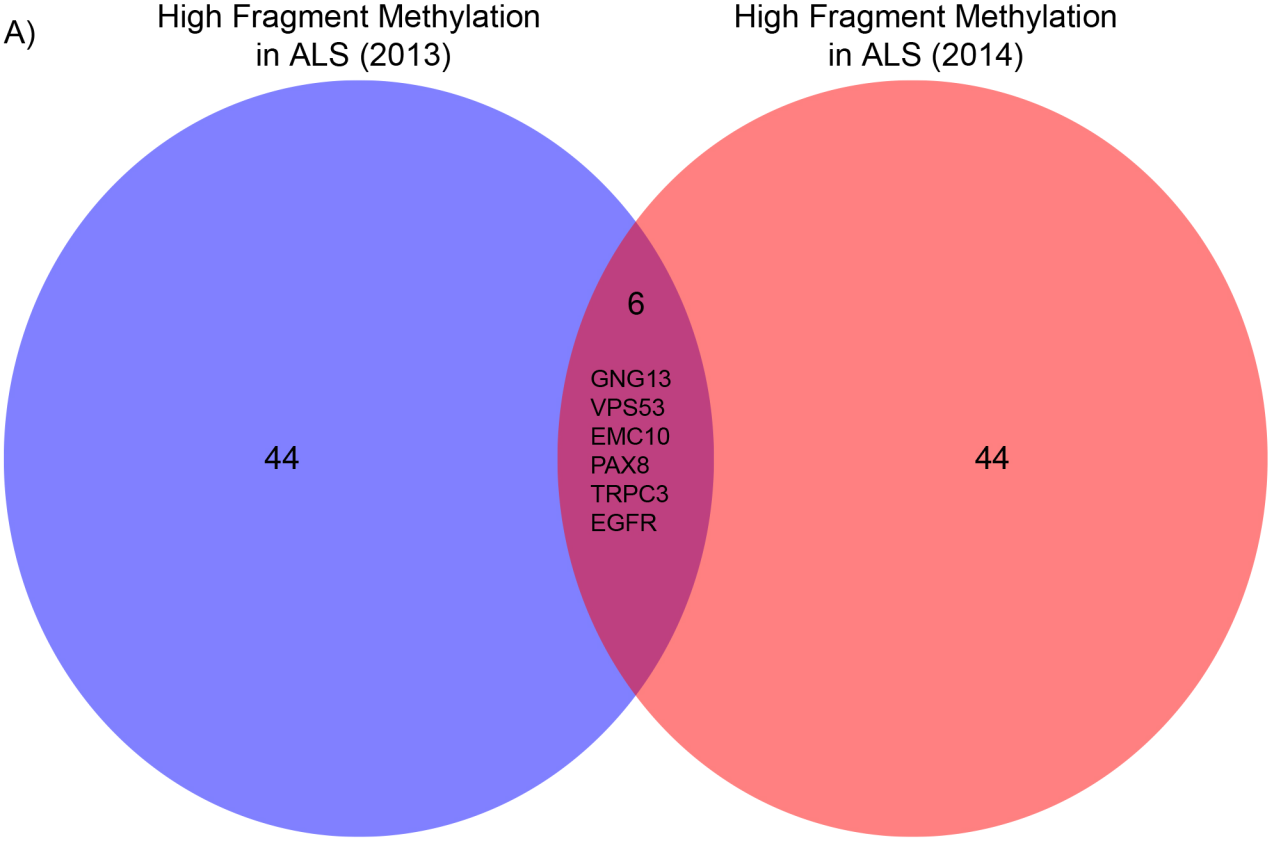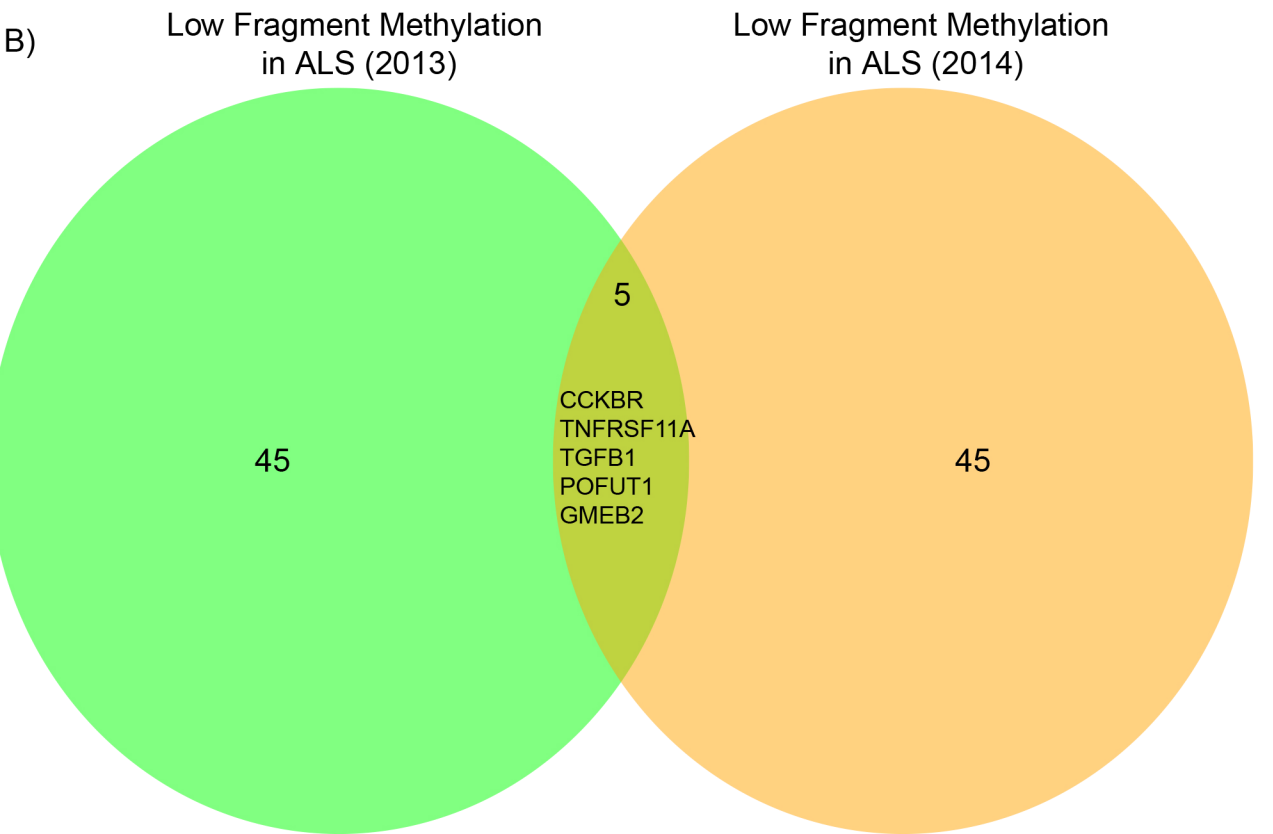

Supplement: supp_fj.201600259RR_Supplemental_Figure4.pdf [file supp_fj.201600259RR_Supplemental_Figure4.pdf]
